# Supplementary material for: Chromatographically separable ruffled non-planar isomeric octaalkylporphycenes: consequences of unsymmetrical substitution upon structure and photophysical properties
Source: Royal Society of Chemistry journal article supplement (doi:10.1039/d0nj01744b), 2020-01-01
Supplement: d0nj01744b1.pdf [file d0nj01744b1.pdf]

*New Journal of Chemistry*

**Electronic Supplementary Information for**

**Chromatographically separable ruffled non-planar isomeric  
Octaalkylporphycenes: Consequences of unsymmetrical  
substitution upon structure and photophysical properties**

**Narendra N. Pati,<sup>a</sup> Sameeta Sahoo,<sup>a</sup> Sipra S. Sahoo,<sup>a</sup> Dipanjan Banerjee,<sup>b</sup>**

**S. Venugopal Rao<sup>b</sup> and Pradeepta K. Panda<sup>\*a</sup>**

*<sup>a</sup>School of Chemistry, University of Hyderabad, Hyderabad-500046, India.*

*<sup>b</sup>Advanced Centre of Research in High Energy Materials (ACRHEM), University of Hyderabad,  
Hyderabad-50006, India.*

**Table of Contents**

|           |                                                             |          |
|-----------|-------------------------------------------------------------|----------|
| <b>1</b>  | Instrumentation and reagents                                | S2-S3    |
| <b>2</b>  | Synthesis                                                   | S4-S5    |
| <b>3</b>  | <sup>1</sup> H & <sup>13</sup> C NMR spectra, and HRMS data | S6-S14   |
| <b>4</b>  | Preparative Thin Layer Chromatography                       | S15      |
| <b>5</b>  | X-ray crystal structures and optimized structures           | S15-S16  |
| <b>6</b>  | Theoretical studies                                         | S16- S20 |
| <b>7</b>  | Electrochemical studies                                     | S20-S21  |
| <b>8</b>  | Tautomeric forms                                            | S21      |
| <b>9</b>  | NLO properties                                              | S22      |
| <b>10</b> | Coordinates of optimised geometry                           | S23-S24  |
| <b>11</b> | References                                                  | S25      |

## 1. Instrumentation and reagents:

Melting points were determined by MR-Vis<sup>+</sup> visual melting point range apparatus from LABINDIA instruments private limited. IR spectra were recorded on NICOLET iS5. HRMS data were obtained by Waters Xevo G-2XS QTOF spectrometer by ESI techniques. NMR spectra were recorded on Bruker 500 MHz FT-NMR spectrometers operating at ambient temperature. TMS was used as internal standard for <sup>1</sup>H NMR spectra. UV-Visible spectrum was recorded on Shimadzu UV-3600 spectrometer. Spectroscopic grade solvent was used for absorbance measurement. Cyclic voltammetry (CV) and differential pulse voltammetry (DPV) measurements were done using CH Instruments Electrochemical analyzer and electrodes were purchased from CH Instruments Inc. All measurements were performed in chloroform under flow of nitrogen and 0.1M tetrabutylammonium hexafluorophosphate (TBAPF<sub>6</sub>) used as a supporting electrolyte. Glassy carbon as working electrode, platinum wire as counter electrode and Ag/AgCl in (1M) KCl as reference electrode were used. The redox potentials were referenced vs. sat. calomel electrode, SCE (0.48V for Fc<sup>+</sup>/Fc couple vs SCE). All cyclic voltammetry data were recorded at 100 mV/s scan rate.

Crystallographic data for **OAPo-T** and **OAPo-C** were collected on BRUKER APEX-II CCD microfocus diffractometer, Mo-K<sub>α</sub> ( $\lambda = 0.71073 \text{ \AA}$ ) radiation was used to collect X-ray reflections from their single crystals. Data reduction was performed using Bruker SAINT software.<sup>S1</sup> Intensities for absorption were corrected using and SADABS 2014/5,<sup>S2</sup> refined using SHELXL-2014/7<sup>S3</sup> with anisotropic displacement parameters for non-H atoms. Hydrogen atoms on O and N were experimentally located in difference electron density maps. All C–H atoms were fixed geometrically using HFIX command in SHELX-TL. A check of the final CIF file using PLATON<sup>S4</sup> did not show any missed symmetry.

Crystallographic data (including the structure factor) for structures **OAPo-T** and **OAPo-C** in this paper have been deposited in the Cambridge Crystallographic Data Centre as supplementary publication numbers CCDC1990315-1990316. Copies of the data can be obtained free of charge on application to CCDC, 12 Union Road, Cambridge CB2 1EZ, UK (Fax: +44(0)-1223-336033 or e-mail: [deposit@ccdc.cam.ac.uk](mailto:deposit@ccdc.cam.ac.uk)).

We have made use of a Ti-sapphire laser amplifier beam (Libra, M/s Coherent) for the Z-scan experiments with the following parameters: ~50 fs pulse duration, repetition rate of 1 kHz, beam diameters in the range of 2-2.5 mm. We utilized a 15-cm lens for focusing the beam onto the sample. We performed the experiment with corresponding Rayleigh range of 3.5-4.5 mm and used neutral density filters for input pulse energy attenuation. The fine powder-like samples were dissolved in DCM (~1.5 mM concentration) and they displayed a linear transmittance of 80-90% in the 800 nm and 1000 nm wavelength range. We have used a 1-mm glass cuvette for holding our solution sample. We utilized a lock-in to fetch together the transmittance data from photo-diode acquisition along with the stage position data received from a linear stage all together interfaced by a LabVIEW program. When any nonlinear optical material is scanned using a Gaussian laser pulse in the focal plane of a convex lens, the transmittance can be written in the following manner, both in open and closed aperture Z-scan methods,

$$Transmittance, T_{OA(2PA)} = \frac{1}{1 + \beta L_{eff} \left( \frac{I_{00}}{1 + \left( \frac{z}{z_0} \right)^2} \right)} \quad \dots (1)$$

$$Transmittance, T_{CA(2PA)} = \left( 1 \pm \left( \frac{4 \left( \frac{z}{z_0} \right) \Delta\Phi}{\left[ 9 + \left( \frac{z}{z_0} \right)^2 \right] \left[ 1 + \left( \frac{z}{z_0} \right)^2 \right]} \right) \right) \quad \dots (2)$$

Here sample effective length of the sample is estimated by  $L_{eff}(cm^{-1}) = \frac{1 - e^{-\alpha L}}{\alpha}$  (2PA), Rayleigh Range, defined by  $Z_0(mm) = \frac{\pi \omega_0^2}{\lambda}$ , Beam waist at focal point ( $z=0$ ),  $\omega_0(mm) = \frac{2.f.\lambda}{\pi.d}$ ,  $\lambda$  be wavelength and  $d$  be the waist at focal point. Now, the non-linear refractive index is to be evaluated from the relation  $n_2 \left( \frac{cm^2}{W} \right) = \frac{\Delta\Phi}{I_0.L_{eff}.k} = \frac{\Delta\Phi.\lambda}{I_0.L_{eff}.2\pi}$ . After all we can estimate both real, imaginary  $\chi^{(3)}$  from the

following equations

$$Im |\chi^{(3)}|(m^2/V^2) = \frac{c\epsilon_0\lambda n_0^2\alpha_2(m/W)}{2\pi}$$

$Re|\chi^{(3)}|(m^2/V^2) = 2c\epsilon_0n_0^2n_2(m^2/W)$  and finally  $\chi^{(3)}$  total will emerge from the above both.

Now we can use the relation  $|\chi^{(3)}|(e.s.u) = \frac{(3 \times 10^4)^2 |\chi^{(3)}|(m^2/V^2)}{4\pi}$  n for unit conversion of  $\chi^{(3)}$ . The errors in these measurements were estimated to be 5% arising from input laser fluctuations and errors in estimation of the beam waist at focus.

Commercially available solvents were distilled before use. Reagents were purchased from Sigma Aldrich, Merck and Spectrochem, India and used as received without further purification unless otherwise stated. Solvents for the reactions were dried according to literature methods.

**2. Synthesis:** Compound **5** was synthesized and characterized as per reported procedure.<sup>S5</sup>

**2.1) 1,1'-(3,4-diethyl-1H,1'H-[2,2'-bipyrrole]-5,5'-diyl)bis(ethan-1-one)(6):**

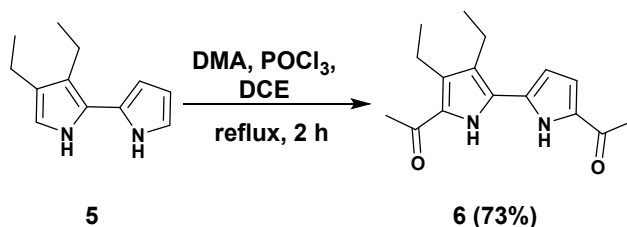

The compound **5** (189 mg, 1mmol) in DCE (10 mL) was rapidly added to ice cooled stirred Vilsmeier acylating mixture prepared from POCl<sub>3</sub> (0.374 mL, 4 mmol) and N, N-dimethylacetamide (0.371 mL, 4 mmol) in DCE (10 mL) under nitrogen and then the reaction mixture was refluxed for 2 h. After cooling sodium acetate solution (5 mmol) was added at 0 °C and again refluxing continued for another 2 h. After cooling the reaction mixture to room temperature, organic layer was separated and water layer was extracted with chloroform for three times. Combined organic layer was passed through anhydrous Na<sub>2</sub>SO<sub>4</sub> and evaporated to dryness to obtain a black solid. Crude reaction mixture was purified by silica gel column chromatography using EtOAc/ Hexane (3:7) and obtained as pale yellowish powder (200 mg).

Melting point: 205-207 °C; IR (KBr) (cm<sup>-1</sup>): 3320, 2964, 1651, 1613, 1393; <sup>1</sup>H NMR (500 MHz, CDCl<sub>3</sub>, δ in ppm): 11.63 (s, 1H), 11.13 (s, 1H), 7.04-7.02 (q, J = 2.3 Hz, 1H), 6.61-6.60 (q, J = 2.6 Hz, 1H), 2.84-2.80 (q, J = 7.6 Hz, 2H), 2.72-2.68 (q, J = 7.6 Hz, 2H), 2.65 (s, 3H), 2.57 (s, 3H), 1.27-1.21 (m, 6H) ; <sup>13</sup>C NMR (125 MHz, CDCl<sub>3</sub>, δ in ppm): 188.5, 134.2, 132.2, 131.0, 128.9,

126.6, 119.4, 110.3, 27.6, 25.5, 18.6, 17.9, 16.3, 15.3; HRMS- (ESI+) m/z: calculated for C<sub>16</sub>H<sub>20</sub>N<sub>2</sub>O<sub>2</sub> [M+H]<sup>+</sup> : 273.1582; found: 273.1612.

## 2.2) Synthesis of 2,7,12,13-tetraethyl-9,10,19,20-tetramethylporphycene (OAPo-T) and 2,3,16,17-tetraethyl-9,10,19,20-tetramethylporphycene (OAPo-C).

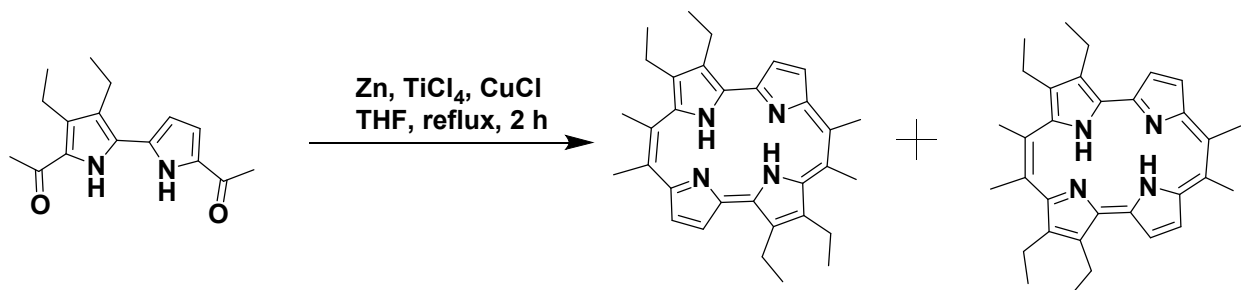

To a slurry of low-valent titanium reagent, generated by reduction of titanium tetrachloride (1.6 mL, 14.688 mmol) in dry THF (200 mL) with activated zinc (1.920 g, 29.3748mmol) and CuCl (291mg, 2.937 mmol) by refluxing for 2 h, a solution of bipyrrrole dialdehyde (200 mg, 0.7344mmol) in dry THF (100 mL) was added dropwise slowly over 1 h under refluxing condition with vigorous stirring. The reaction mixture was heated under reflux for additional 2 h and then hydrolyzed by slow addition of 10% aqueous potassium carbonate (ca. 100 mL) to the ice cooled reaction mixture and filtered through celite to remove the excess metal, washed with ethyl acetate and organic layer was separated. Organic layer was evaporated to dryness under reduced pressure. Resulting crude reaction mixture was dissolved in chloroform (50 mL), washed with water, organic layer was passed through anhydrous sodium sulphate and evaporated to dryness under reduced pressure. The crude reaction mixture was purified by silica gel column chromatography using chloroform/hexane (15:85) as eluent to obtain mixture of both trans- and cis- isomers with 13% yield (23 mg). Further, both isomers ( $R_f = 0.41$  for **OAPo-T** and  $R_f = 0.27$  for **OAPo-C**) were purified and isolated through preparative thin layer chromatography by using DCM:hexane (25:75) solvent mixture as eluent with isolated yield of 8% (**OAPo-T**, 14.2 mg) and 5% (**OAPo-C**, 8.8 mg).

**2,3,12,13-Tetraethyl-9,10,19,20-tetramethylporphycene, OAPo-T** (purple solid): M.P. 310 °C; IR (KBr) (cm<sup>-1</sup>): 2922, 2852, 1460, 1259, 1015; <sup>1</sup>H NMR (500 MHz, CDCl<sub>3</sub>),  $\delta$  (ppm): 9.25-9.24 (d, J = 4.5 Hz, 2H), 9.01-9.00 (d, J = 4.5 Hz, 2H), 5.67 (br, 2H), 4.02-3.97 (q, J = 7.6 Hz, 4H), 3.90 (s, 6H), 3.75-3.71 (m, 10H), 1.77-1.51 (m, 12H), <sup>13</sup>C NMR (125 MHz, CDCl<sub>3</sub>),  $\delta$  (ppm): 146.2, 143.0, 140.0, 139.4, 135.8, 132.0, 128.1, 125.1, 124.6, 124.0, 24.6, 23.9, 21.0, 20.6, 17.6, 16.9; HRMS (ESI+): m/z: calculated for C<sub>32</sub>H<sub>38</sub>N<sub>4</sub> [M+H]<sup>+</sup> : 479.3174; found: 479.3175. UV-vis data,  $\lambda_{max}$  (in nm): 382, 613, 659, 691.

**2,3,16,17-Tetraethyl-9,10,19,20-tetramethylporphycene, OAPo-C** (purple solid): M.P. 323 °C; IR (KBr) (cm<sup>-1</sup>): 2965, 2928, 1464, 1178, 1048 ; <sup>1</sup>H NMR (500 MHz, CDCl<sub>3</sub>),  $\delta$  (ppm): 9.21-9.20 (d, J = 4.4 Hz, 4H), 9.00-8.99 (d, J = 4.5 Hz, 4H), 6.92(br, 1H), 4.95 (br, 1H), 3.89-3.84 (m,

10H), 3.65 (s, 6H), 3.63-3.59 (q, J = 7.5 Hz, 4H) 1.70-1.65 (m, 12H);  $^{13}\text{C}$  NMR (125 MHz,  $\text{CDCl}_3$ ),  $\delta$  (ppm): 145.0, 144.9, 139.0, 138.4, 135.7, 132.8, 127.9, 124.9, 124.5, 123.9, 23.9, 23.7, 21.6, 20.6, 17.5, 16.8; HRMS (ESI+): m/z: calculated for  $\text{C}_{32}\text{H}_{38}\text{N}_4$   $[\text{M}+\text{H}]^+$  : 479.3174; found: 479.3177. UV-vis data,  $\lambda_{\text{max}}$  (in nm): 384, 663.

### 3. $^1\text{H}$ and $^{13}\text{C}$ NMR spectra, and HRMS data:

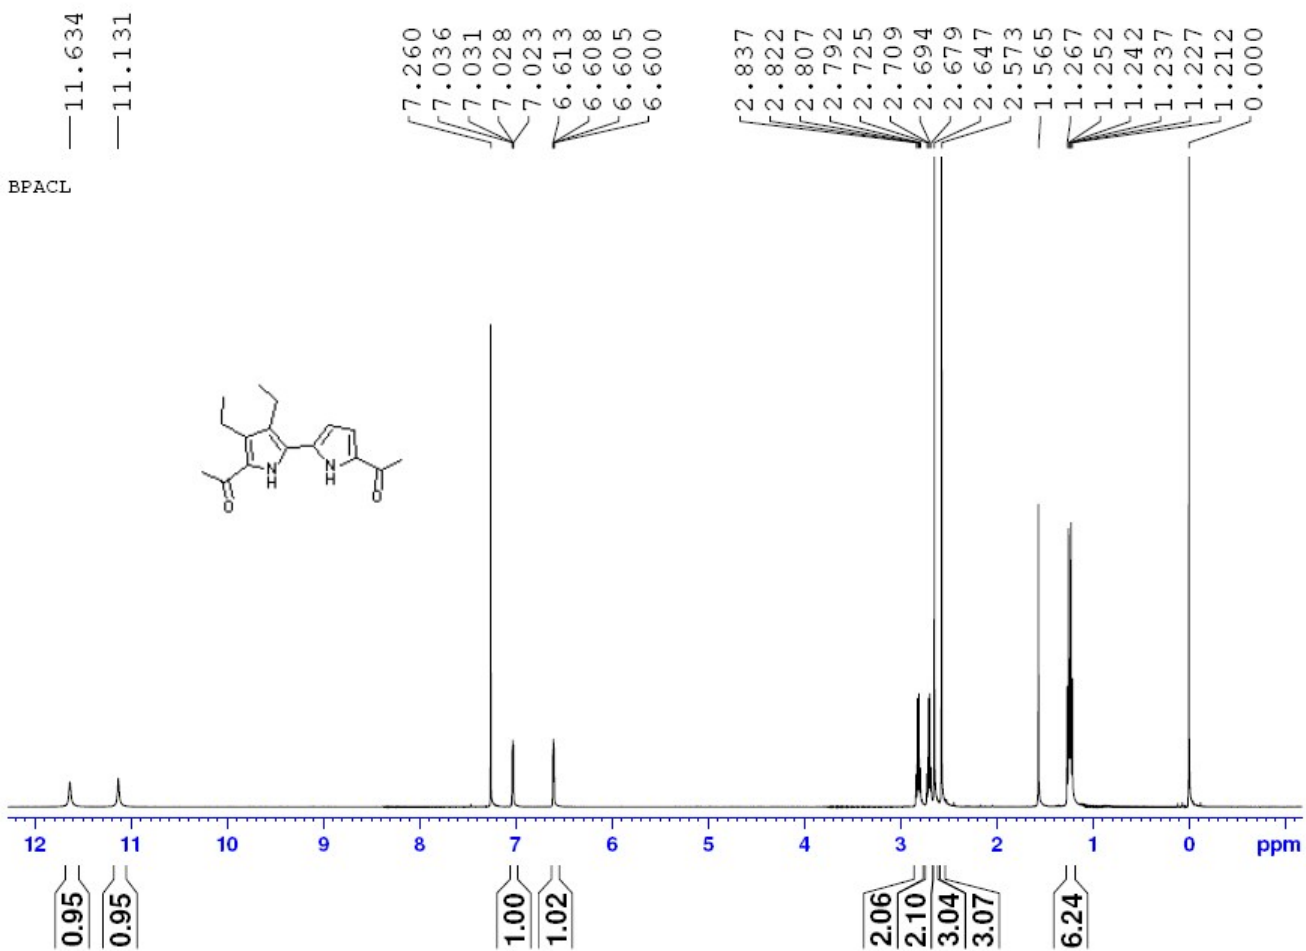

**Figure S1:**  $^1\text{H}$  NMR spectrum of **6** in  $\text{CDCl}_3$ .

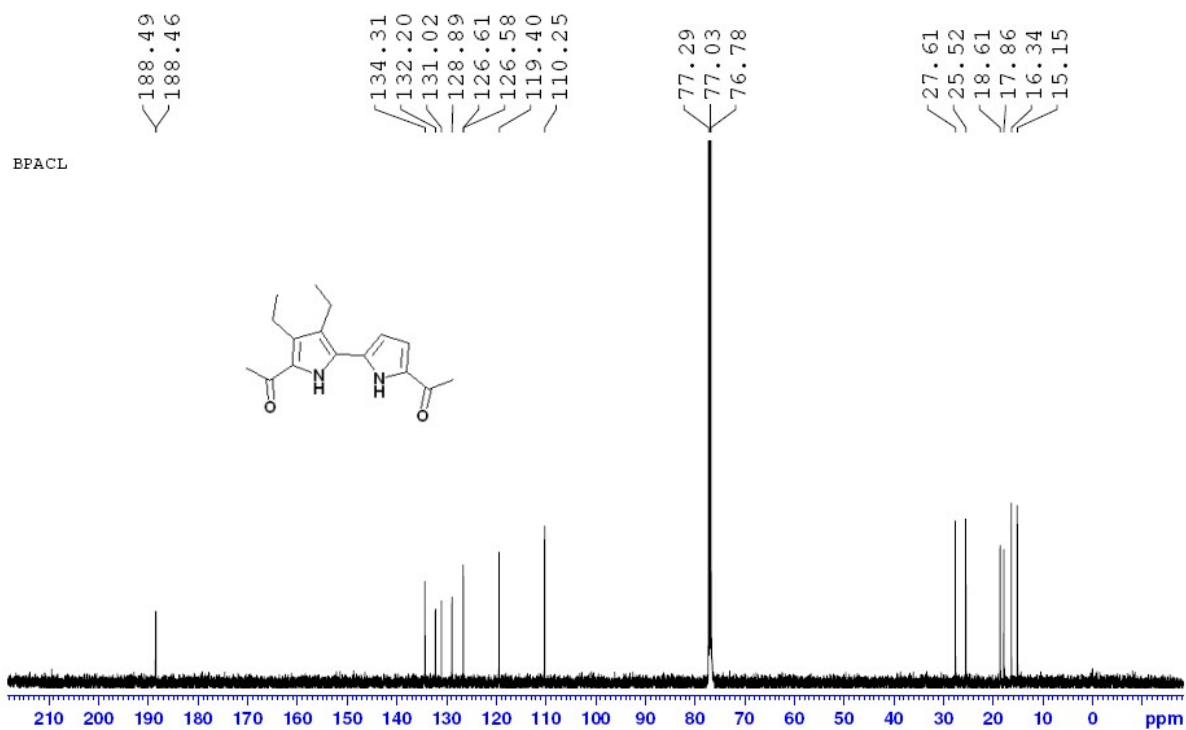

**Figure S2:**  $^{13}\text{C}$  NMR spectrum of **6** in  $\text{CDCl}_3$ .



BPACL

UNIVERSITY OF HYDERABAD  
ACRHEM  
XEVO-G2XSQTOF#YEA1155

10-Feb-2020  
15:12:06

10022020\_27 +VE 19 (0.219) AM2 (Ar,22000.0,556.28,0.00,LS 10); Cm (19:26-69:124)

1: TOF MS ES+  
7.52e7

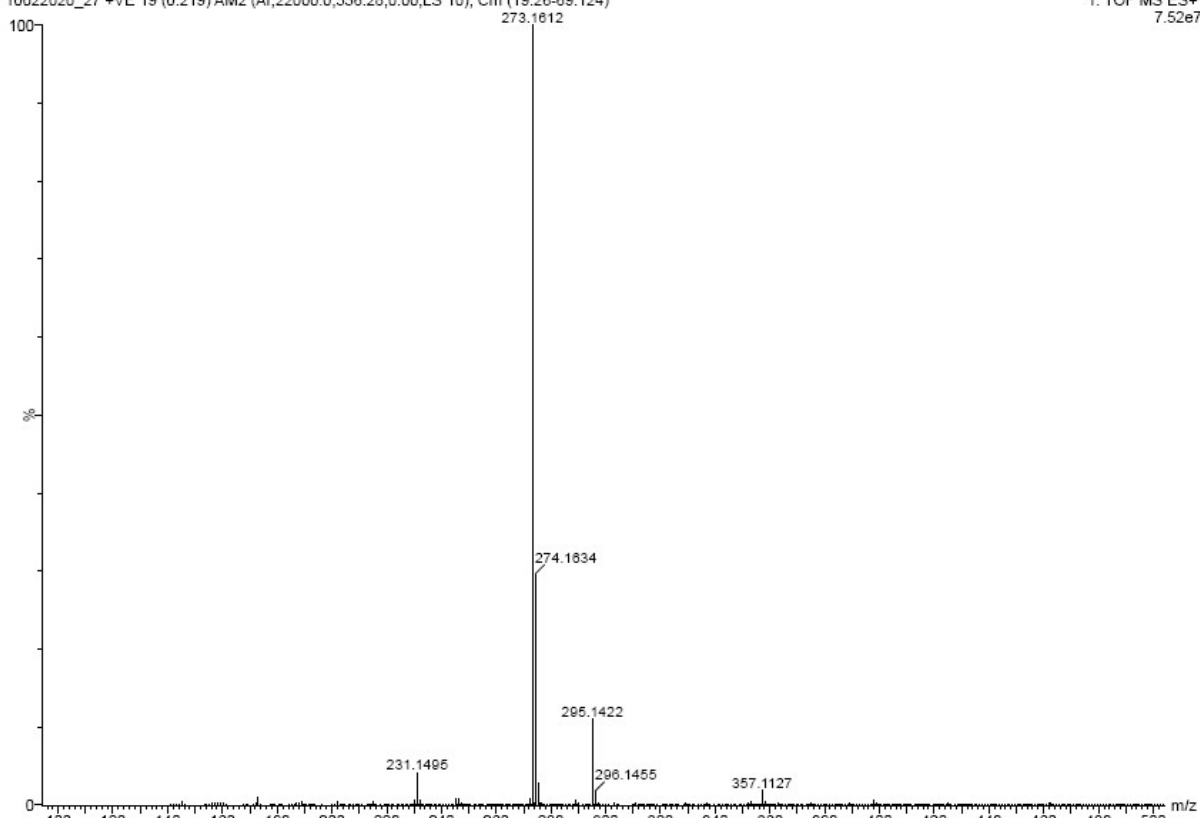

**Figure S3:** HRMS data of **6**.

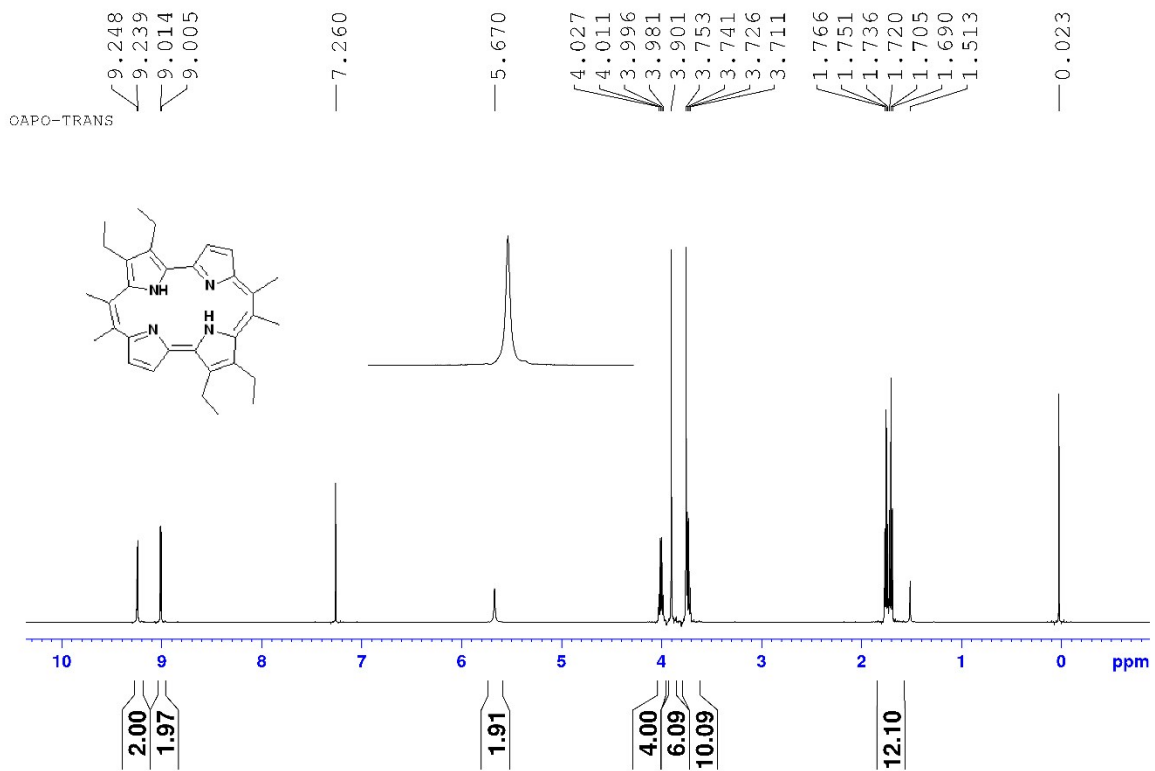

**Figure S4:**  $^1\text{H}$  NMR spectrum of OAPo-T in  $\text{CDCl}_3$ .

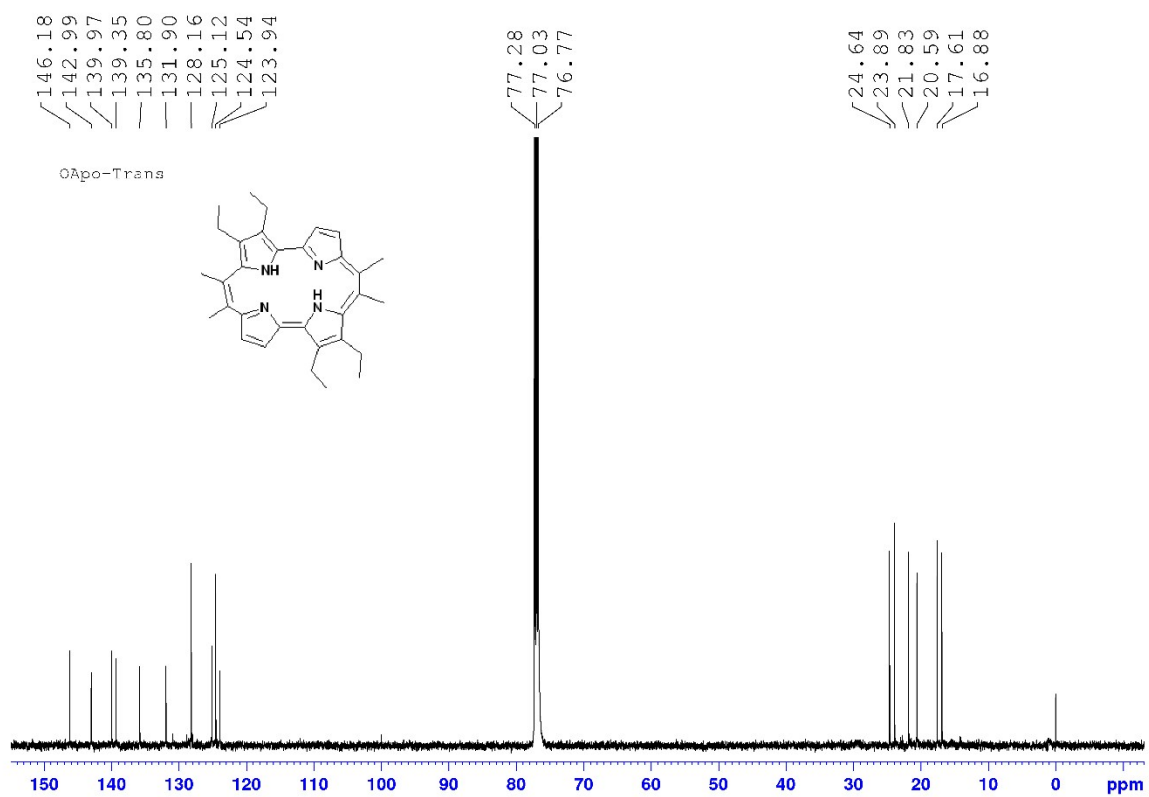

**Figure S5:** <sup>13</sup>C NMR spectrum of OAPo-T in CDCl<sub>3</sub>.

OAPOT

UNIVERSITY OF HYDERABAD  
ACRHEM  
XEVO-G2XSQTOF#YEA1155

10-Feb-2020  
15:14:43

10022020\_28 +VE 19 (0.219) AM2 (Ar,22000.0,556.28,0.00,LS 10); Cm (19:29-82:134)

1: TOF MS ES+  
3.46e7

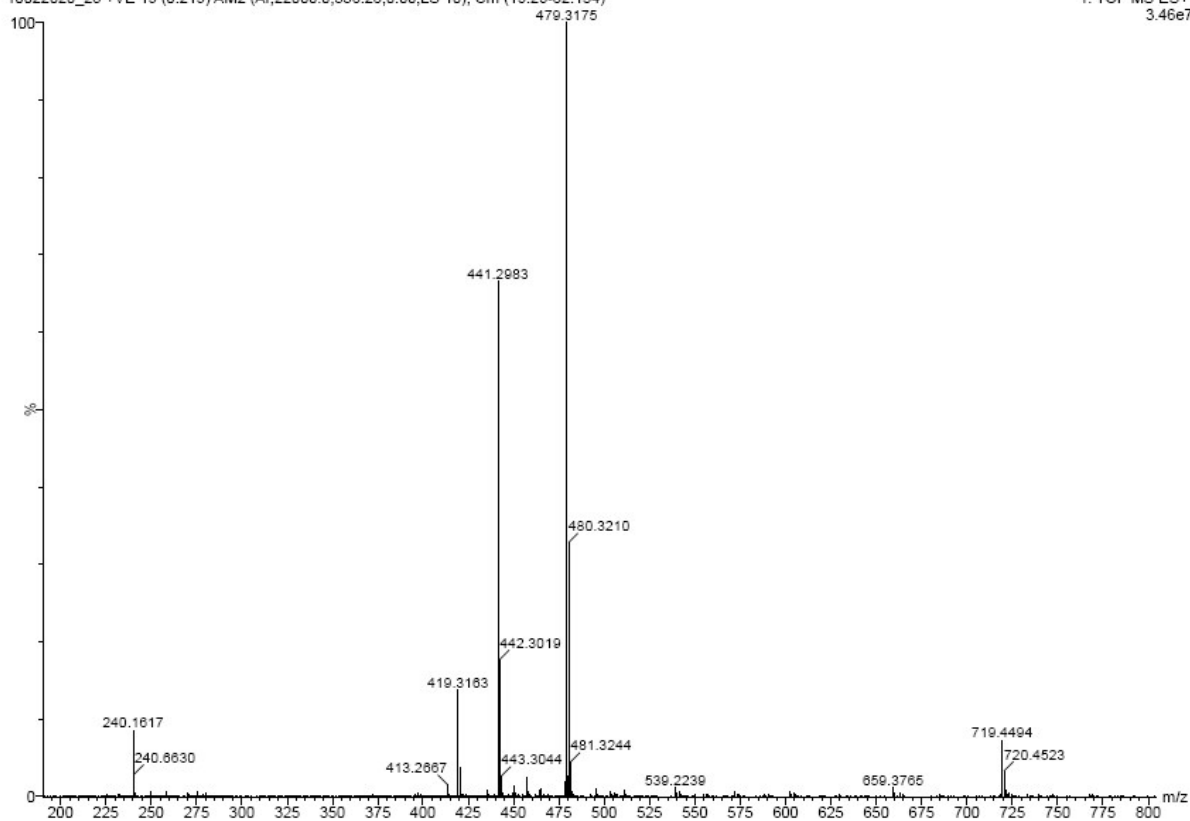

Figure S6: HRMS data of OAPo-T.

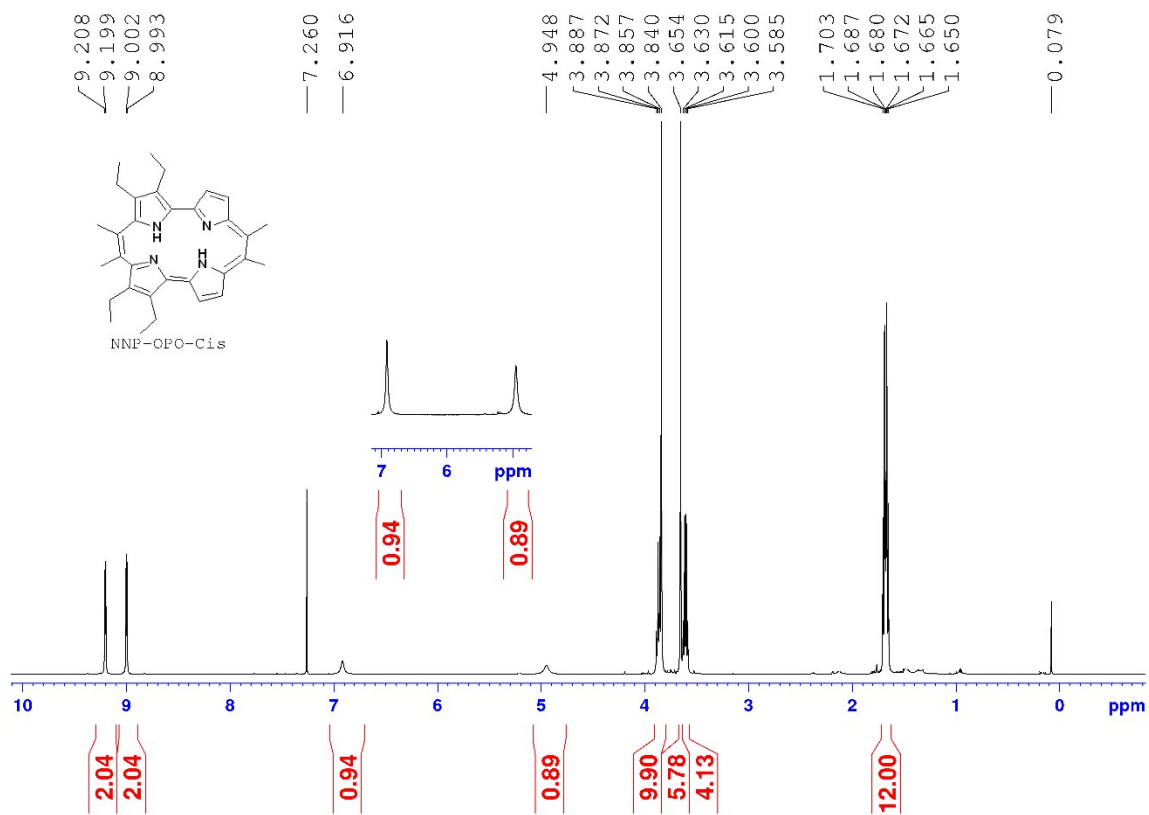

**Figure S7:**  $^1\text{H}$  NMR spectrum of OAPo-C in  $\text{CDCl}_3$ .

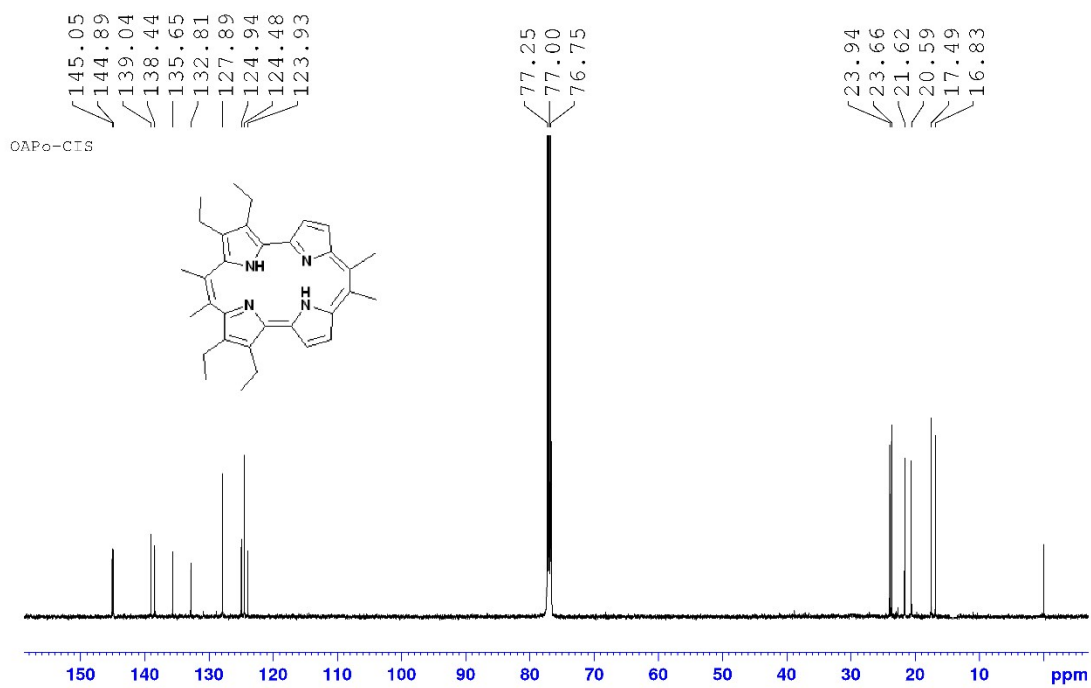

**Figure S8:**  $^{13}\text{C}$  NMR spectrum of OAPo-C in  $\text{CDCl}_3$ .

OAPOC

UNIVERSITY OF HYDERABAD  
ACRHEM  
XEVO-G2XSQTOF#YEA1155

10-Feb-2020  
15:17:25

10022020\_29 +VE 24 (0.262) AM2 (Ar,22000.0,556.28,0.00,LS 10); Cm (24:33-91:145)

1: TOF MS ES+  
4.70e7

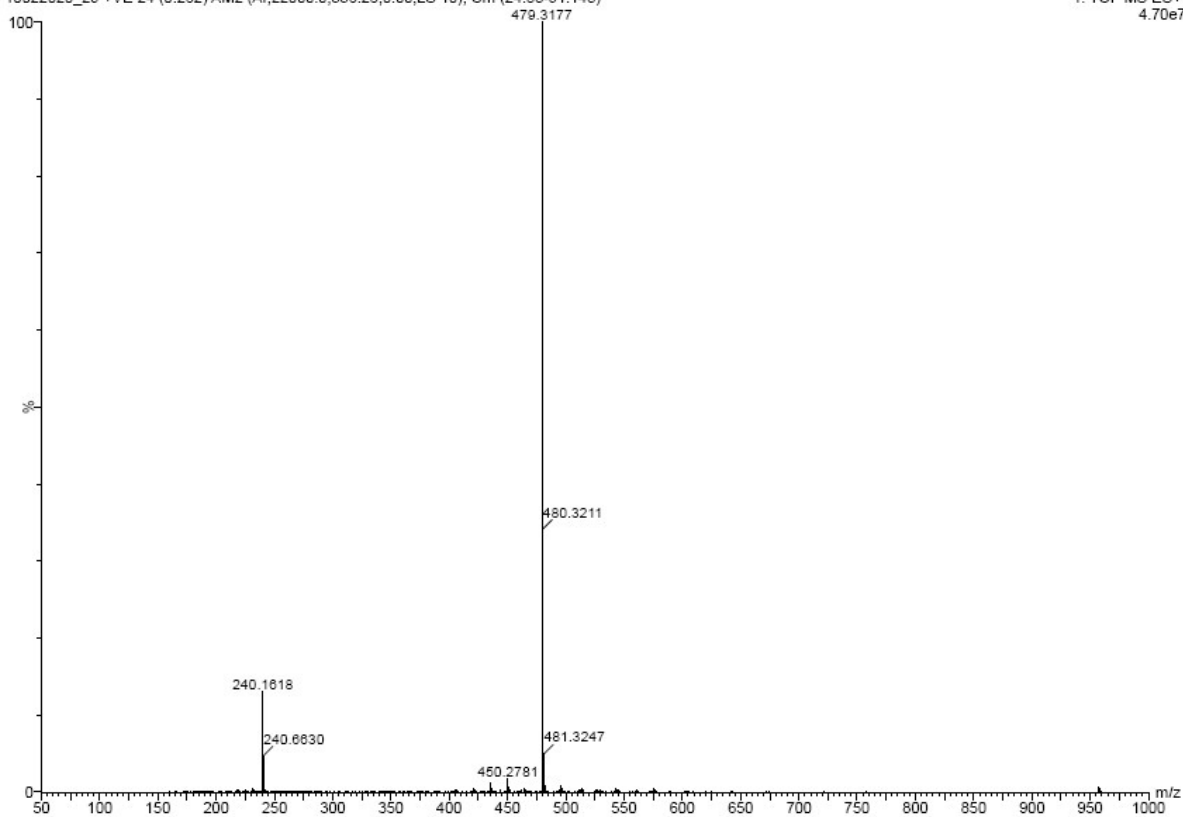

**Figure S9: HRMS data of OAPo-C.**

#### 4. Preparative Thin Layer Chromatography.

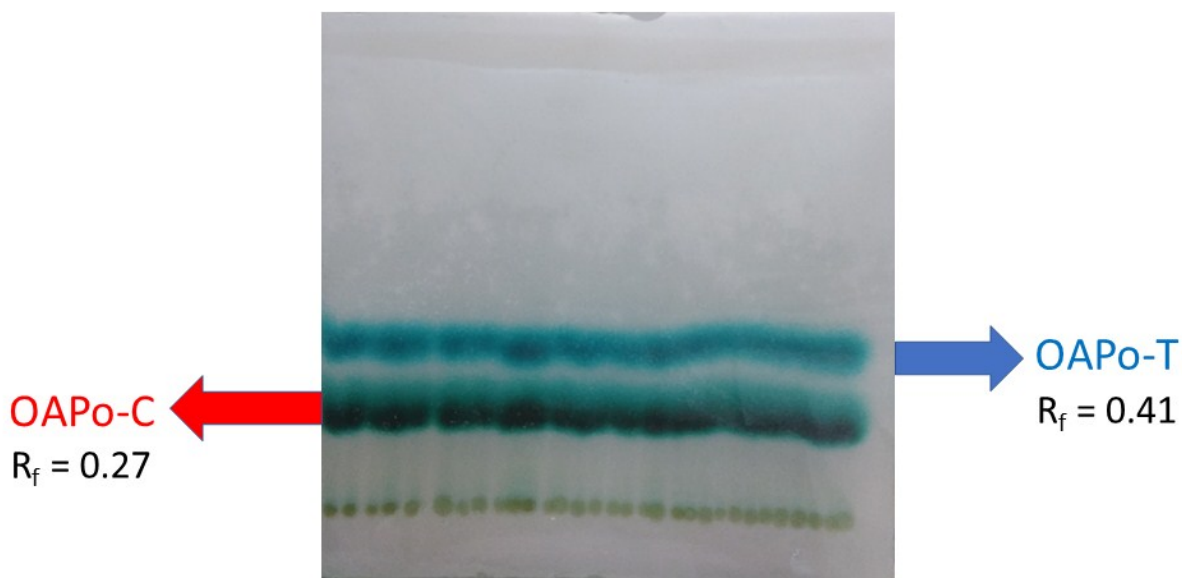

**Figure S10** Preparative thin layer chromatography of **OAPo-C** and **OAPo-T**. Silica gel used as stationary phase and hexane:DCM (75:25) solvent mixture as eluent.

#### 5. X-ray crystal structures:

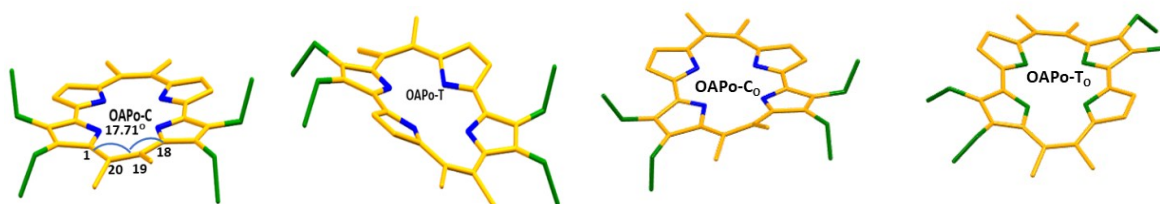

**Figure S11** Crystal structure of **OAPo-C** and **OAPo-T** and optimized structure **OAPo-Co** and **OAPo-To** with ethyl groups orientation with torsion angle for **OAPo-C**. Color code: orange: C, blue: N, green: ethyl carbons.



**Table S1:** Skeletal deviations of the macrocycle atoms from the 24 atoms/4N mean plane for **OAPo-C** and **OAPo-T** and their optimized structure **OAPo-Co** and **OAPo-To**.

| <b>Label</b> | <b>OAPo-C (Crystal)<br/>Deviation from<br/>mean plane (Å)</b> | <b>OAPo-T (Crystal)<br/>Deviation from<br/>mean plane (Å)</b> | <b>OAPo-Co<br/>(Optimized)<br/>Deviation from<br/>mean plane (Å)</b> | <b>OAPo-To<br/>(Optimized)<br/>Deviation from<br/>mean plane (Å)</b> |
|--------------|---------------------------------------------------------------|---------------------------------------------------------------|----------------------------------------------------------------------|----------------------------------------------------------------------|
| <b>C1</b>    | <b>0.125</b>                                                  | <b>0.268</b>                                                  | <b>0.260</b>                                                         | <b>0.070</b>                                                         |
| <b>C2</b>    | <b>0.166</b>                                                  | <b>0.196</b>                                                  | <b>0.225</b>                                                         | <b>0.398</b>                                                         |
| <b>C3</b>    | <b>0.123</b>                                                  | <b>0.101</b>                                                  | <b>0.019</b>                                                         | <b>0.557</b>                                                         |
| <b>C4</b>    | <b>0.057</b>                                                  | <b>0.109</b>                                                  | <b>0.034</b>                                                         | <b>0.174</b>                                                         |
| <b>C5</b>    | <b>0.012</b>                                                  | <b>0.010</b>                                                  | <b>0.115</b>                                                         | <b>0.121</b>                                                         |
| <b>C6</b>    | <b>0.066</b>                                                  | <b>0.267</b>                                                  | <b>0.196</b>                                                         | <b>0.336</b>                                                         |
| <b>C7</b>    | <b>0.049</b>                                                  | <b>0.333</b>                                                  | <b>0.234</b>                                                         | <b>0.103</b>                                                         |
| <b>C8</b>    | <b>0.172</b>                                                  | <b>0.075</b>                                                  | <b>0.157</b>                                                         | <b>0.254</b>                                                         |
| <b>C9</b>    | <b>0.310</b>                                                  | <b>0.058</b>                                                  | <b>0.086</b>                                                         | <b>0.568</b>                                                         |
| <b>C10</b>   | <b>0.350</b>                                                  | <b>0.304</b>                                                  | <b>0.162</b>                                                         | <b>0.424</b>                                                         |
| <b>C11</b>   | <b>0.281</b>                                                  | <b>0.123</b>                                                  | <b>0.202</b>                                                         | <b>0.078</b>                                                         |
| <b>C12</b>   | <b>0.257</b>                                                  | <b>0.147</b>                                                  | <b>0.302</b>                                                         | <b>0.384</b>                                                         |
| <b>C13</b>   | <b>0.142</b>                                                  | <b>0.400</b>                                                  | <b>0.198</b>                                                         | <b>0.342</b>                                                         |
| <b>C14</b>   | <b>0.107</b>                                                  | <b>0.277</b>                                                  | <b>0.052</b>                                                         | <b>0.195</b>                                                         |
| <b>C15</b>   | <b>0.008</b>                                                  | <b>0.425</b>                                                  | <b>0.070</b>                                                         | <b>0.149</b>                                                         |
| <b>C16</b>   | <b>0.141</b>                                                  | <b>0.917</b>                                                  | <b>0.327</b>                                                         | <b>0.562</b>                                                         |
| <b>C17</b>   | <b>0.086</b>                                                  | <b>0.893</b>                                                  | <b>0.418</b>                                                         | <b>0.069</b>                                                         |
| <b>C18</b>   | <b>0.047</b>                                                  | <b>0.367</b>                                                  | <b>0.184</b>                                                         | <b>0.266</b>                                                         |
| <b>C19</b>   | <b>0.101</b>                                                  | <b>0.080</b>                                                  | <b>0.030</b>                                                         | <b>0.565</b>                                                         |
| <b>C20</b>   | <b>0.118</b>                                                  | <b>0.285</b>                                                  | <b>0.374</b>                                                         | <b>0.048</b>                                                         |
| <b>N1</b>    | <b>0.043</b>                                                  | <b>0.203</b>                                                  | <b>0.073</b>                                                         | <b>0.182</b>                                                         |
| <b>N2</b>    | <b>0.120</b>                                                  | <b>0.127</b>                                                  | <b>0.091</b>                                                         | <b>0.214</b>                                                         |
| <b>N3</b>    | <b>0.204</b>                                                  | <b>0.040</b>                                                  | <b>0.064</b>                                                         | <b>0.173</b>                                                         |
| <b>N4</b>    | <b>0.077</b>                                                  | <b>0.107</b>                                                  | <b>0.013</b>                                                         | <b>0.191</b>                                                         |

## **6: Theoretical studies**

Quantum mechanical calculations were performed with Gaussian 09 program<sup>S6</sup> provided by CMSD facility of University of Hyderabad. All calculations were carried out by density functional theory (DFT) with Becke's three-parameter hybrid exchange functional and the Lee-Yang-Parr correlation functional (B3LYP) and the 6-31+G(d,p) basis set was used. The molecular orbitals were visualized using Gauss view 4.1 software. The theoretical excitation energies are obtained for the compounds by applying the TD-SCF method, which are visualized and tabulated by using

GaussSum 3.0 software. The nucleus independent chemical shift, NICS (0) values were obtained with gauge independent atomic orbital (GIAO) method based on the crystal structure geometries. <sup>S7</sup> HOMA (Harmonic Oscillator Model of Aromaticity) was calculated by using Ropt (C-C) = 1.388 Å and Ropt (C-N) = 1.334 Å<sup>S8</sup> based on the optimized geometries.

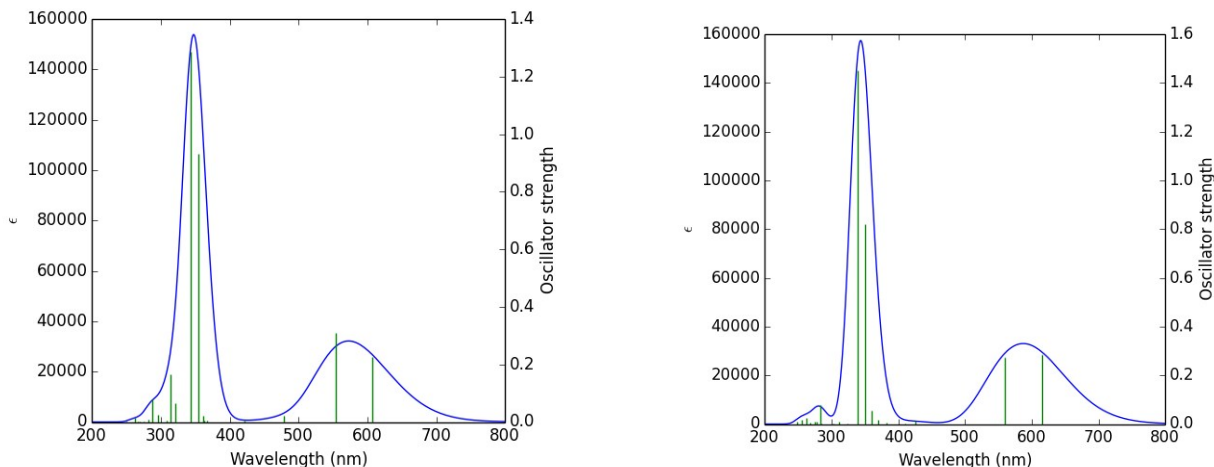

**Figure S12:** Theoretical absorption spectrum (by TD-DFT) of **OAPo-C** (left) and **OAPo-T**(right).

**Table S2:** Summary of theoretical excitation energies of **OAPo-C** in chloroform.

| Sl. No. | Wavelength (nm) | Oscillator Strength | Major contributions                                    |
|---------|-----------------|---------------------|--------------------------------------------------------|
| 1       | 343             | 1.2864              | H-1 → L+1 (73%), HOMO → LUMO (12%)                     |
| 2       | 355             | 0.9309              | H-1 → LUMO (12%), HOMO → L+1 (85%)                     |
| 3       | 554             | 0.3095              | H-1 → LUMO (74%), HOMO → LUMO (15%)<br>HOMO → L+1 (9%) |
| 4       | 608             | 0.2248              | H-1 → LUMO (15%), HOMO → LUMO (72%), H-1 → L+1 (8%)    |

**Table S3:** Summary of theoretical excitation energies of **OAPo-T** in chloroform.

| Sl. No. | Wavelength (nm) | Oscillator Strength | Major contributions                                                                                     |
|---------|-----------------|---------------------|---------------------------------------------------------------------------------------------------------|
| 1       | 340             | 1.4521              | H-5 → LUMO (14%), H-1 → L+1 (51%), HOMO → L+1 (17%), H-4 → LUMO (4%), H-1 → LUMO (4%), HOMO → LUMO (8%) |
| 2       | 351             | 0.8194              | H-1 → L+1 (27%), HOMO → L+1 (60%), H-1 → LUMO (8%)                                                      |
| 3       | 559             | 0.2743              | H-1 → LUMO (88%), HOMO → L+1 (12%)                                                                      |

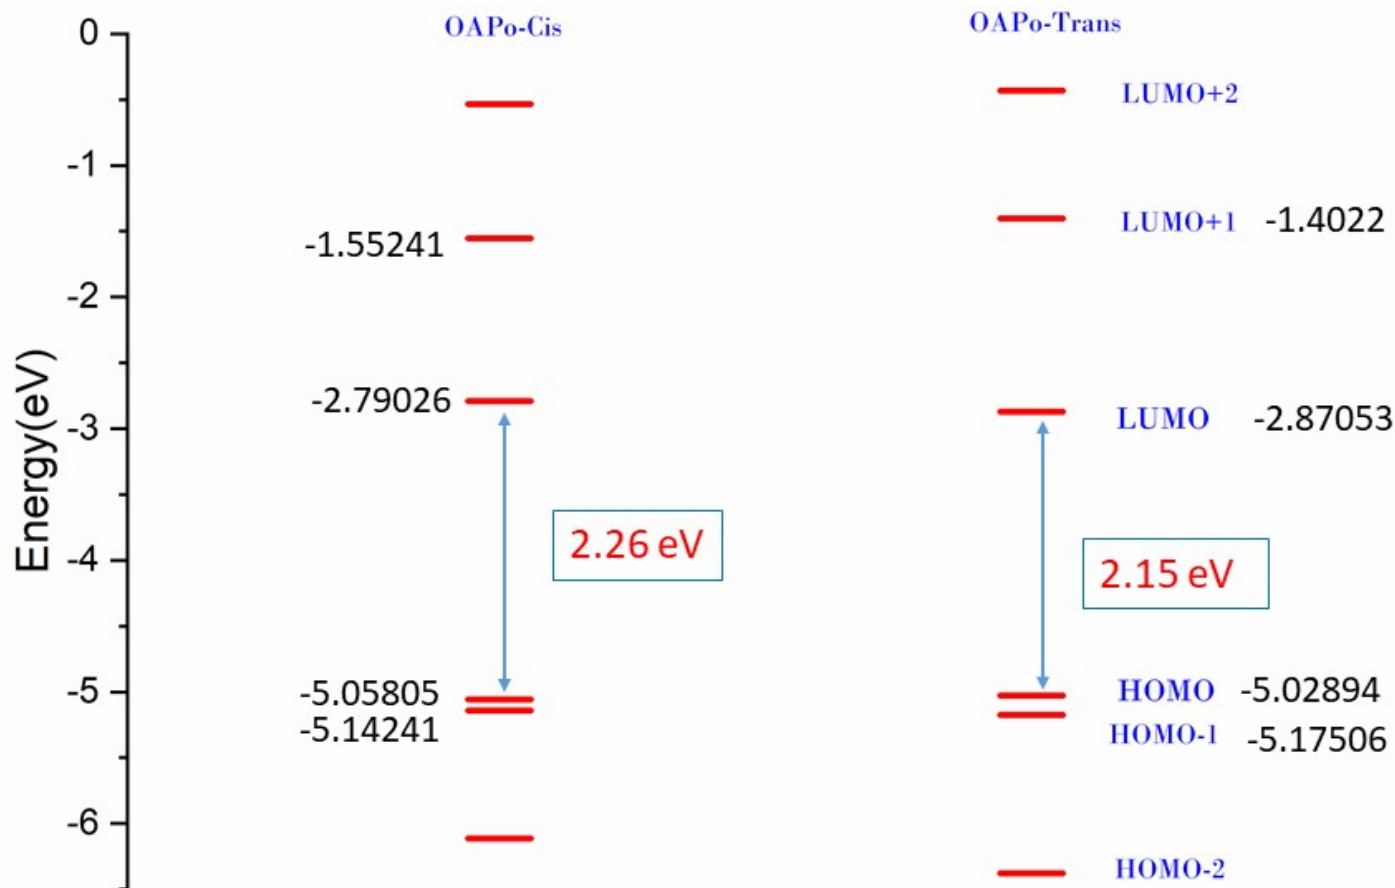

**Figure S13:** HOMO-LUMO energy diagram of **OAPo-C** and **OAPo-T**

**Table S4:** Summary of selected MO diagrams of DFT optimized structure of **OAPo-C**.

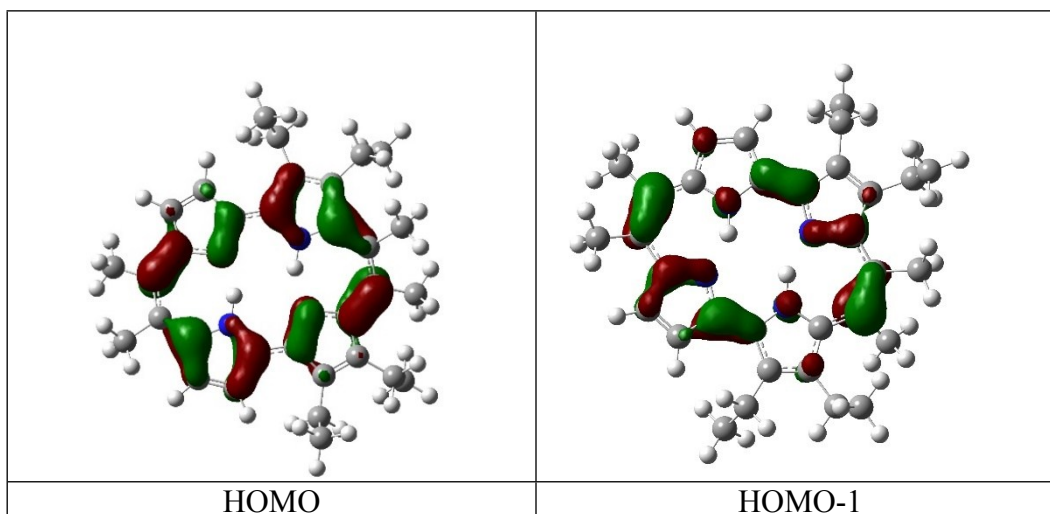

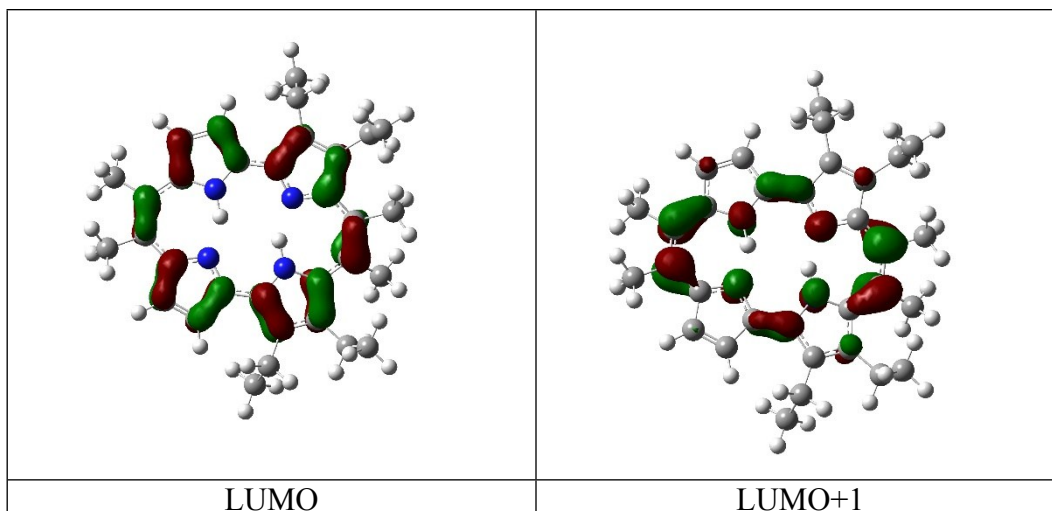

**Table S5: Summary of selected MO diagrams of DFT optimized structure of OAPo-T.**

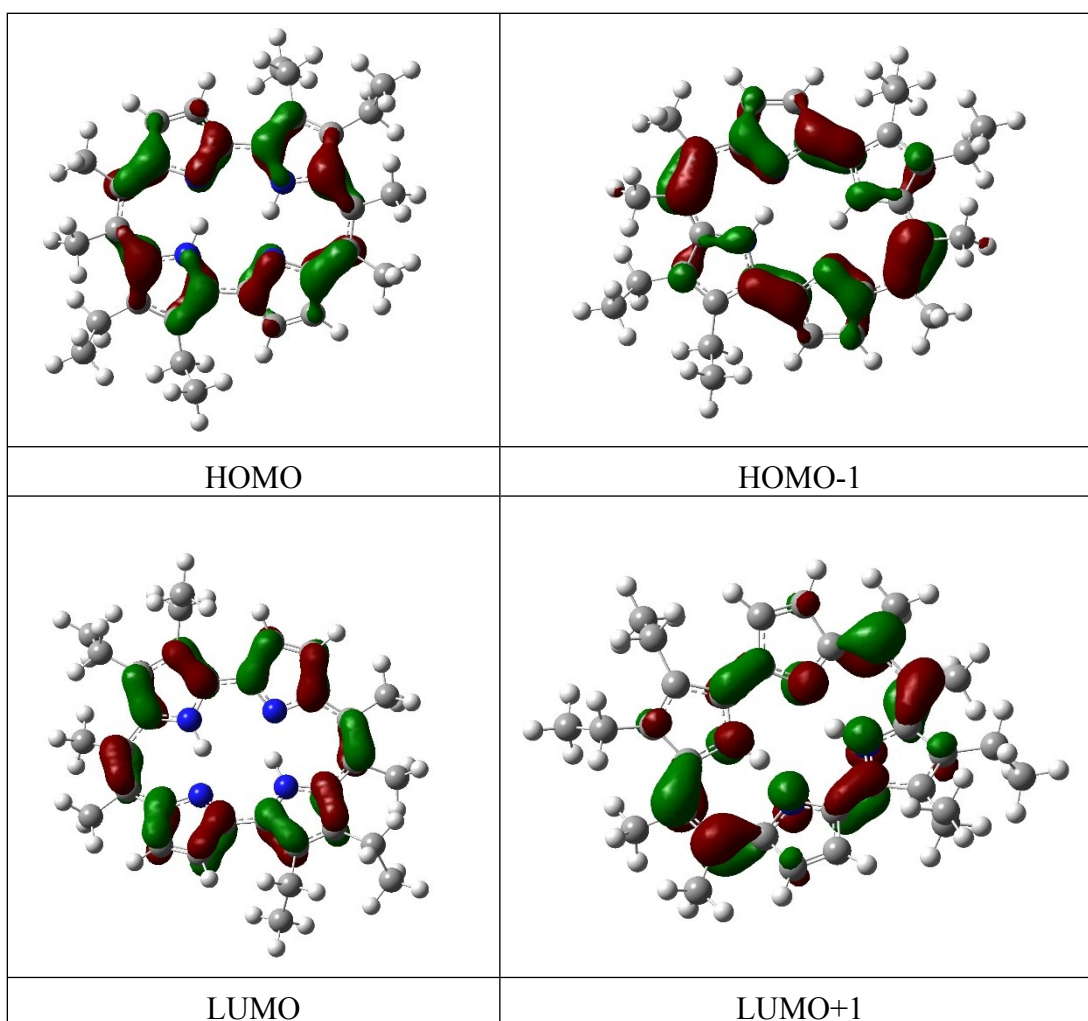

**Table S6. Summary of calculated NICS (0) and HOMA values.**

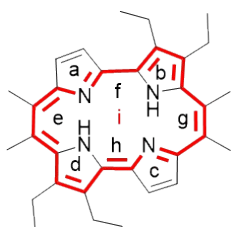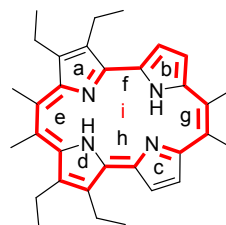

| ICS value for <b>OAPo-T</b> | Labels | NICS value for <b>OAPo-C</b> |
|-----------------------------|--------|------------------------------|
| -5.195                      | a      | -3.466                       |
| -10.802                     | b      | -12.019                      |
| -5.195                      | c      | -4.894                       |
| -10.802                     | d      | -10.161                      |
| -16.019                     | e      | -16.17                       |
| -23.918                     | f      | -24.87                       |
| -16.019                     | g      | -16.17                       |
| -23.987                     | h      | -25.06                       |
| -11.835                     | i      | -11.93                       |

| Macrocycle    | HOMA  |
|---------------|-------|
| <b>OAPo-C</b> | 0.562 |
| <b>OAPo-T</b> | 0.466 |

## 7. Electrochemical study.

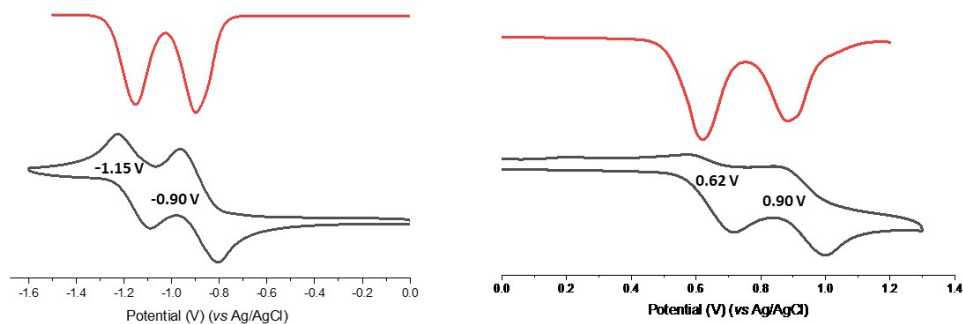

**Fig. S14** Cyclic voltammogram (black line) and differential pulse voltammogram (red line) of **OAPo-T** vs Ag/AgCl in DCM.

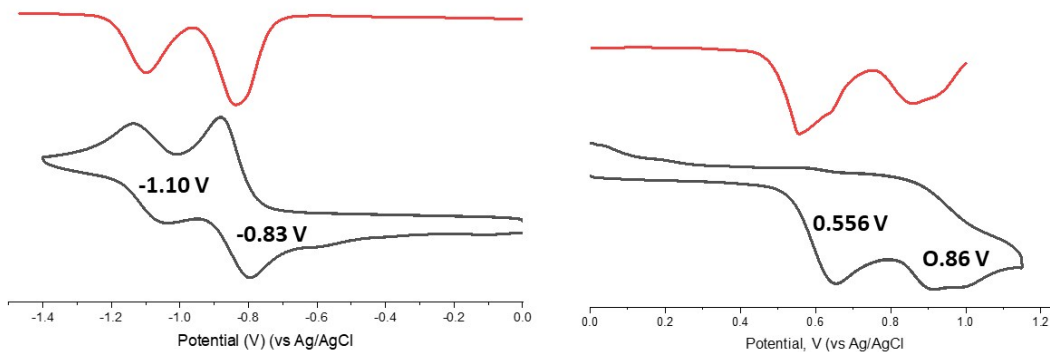

**Fig. S15** Cyclic voltammogram (black line) and differential pulse voltammogram (red line) of **OAPo-C** vs Ag/AgCl in DCM.

### 8. Tautomeric forms of OAPo-C and OAPo-T:

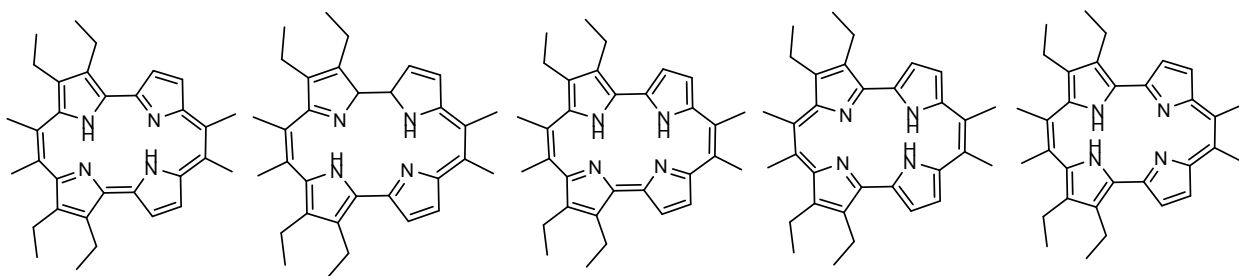

**Fig. S16** Different tautomeric forms of **OAPo-C**.

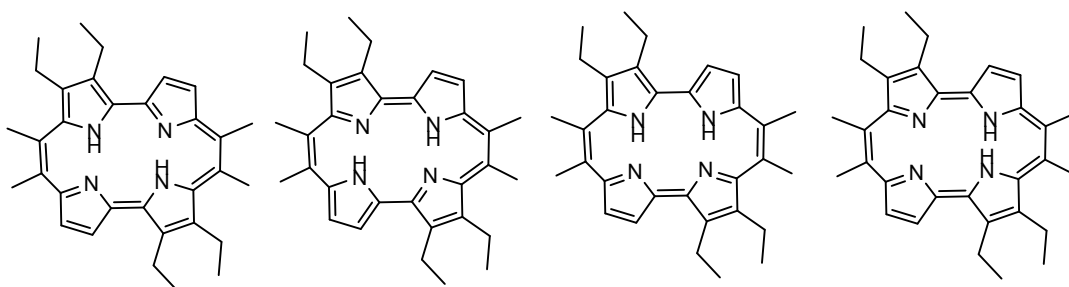

**Fig. S17** Different tautomeric forms of **OAPo-T**.

## 9. NLO properties of OAPo-C and OAPo-T.

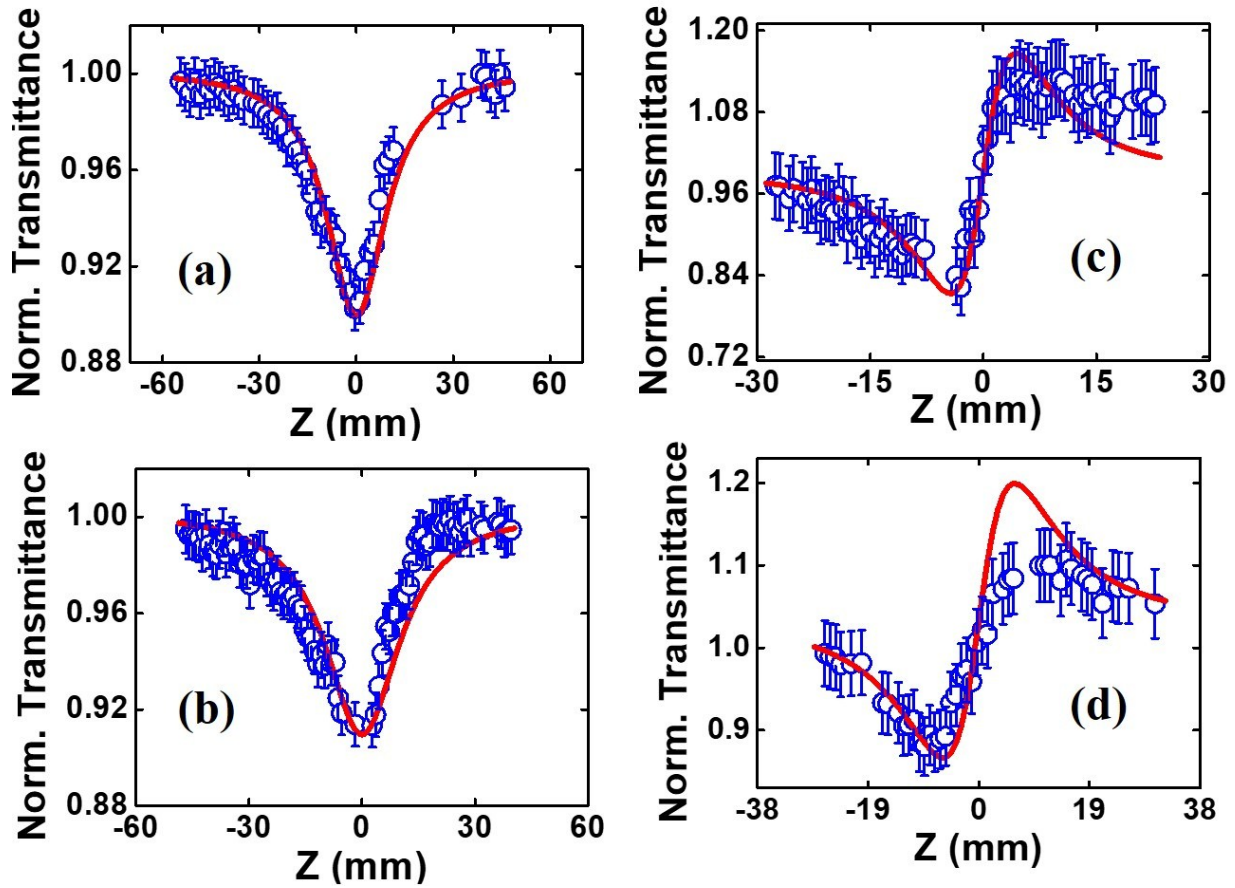

**Fig. S18** Experimental and theoretically fitted Z-scan data for sample **OAPo-T** & **OAPo-C** in OA mode (a & b) and CA mode (c & d) at 1000 nm. Open symbols are experimental data while the solid lines are theoretical fits to the data.

**Table S7: NLO properties of OAPo-C and OAPo-T\***

| $\lambda$ (nm) | $\beta \times 10^{-11}$<br>(cm W <sup>-1</sup> ) | $\sigma_{2PA}$ (GM) | Im ( $\chi^{(3)}$ )<br>$\times 10^{-15}$<br>(e.s.u.) | $n_2 \times 10^{-15}$<br>(cm <sup>2</sup> W <sup>-1</sup> ) | Re( $\chi^{(3)}$ )<br>$\times 10^{-15}$<br>(e.s.u.) | Total ( $\chi^{(3)}$ )<br>$\times 10^{-15}$<br>(e.s.u.) |
|----------------|--------------------------------------------------|---------------------|------------------------------------------------------|-------------------------------------------------------------|-----------------------------------------------------|---------------------------------------------------------|
| <b>OAPo-C</b>  |                                                  |                     |                                                      |                                                             |                                                     |                                                         |
| 800            | 0.4                                              | 145                 | 1.97                                                 | 0.259 (-ve)                                                 | 19.9                                                | 20                                                      |
| 1000           | 0.069                                            | 20                  | 0.43                                                 | 0.08 (+ve)                                                  | 6.18                                                | 6.2                                                     |
| <b>OAPo-T</b>  |                                                  |                     |                                                      |                                                             |                                                     |                                                         |
| 800            | 0.44                                             | 159.1               | 2.16                                                 | 0.34 (+ve)                                                  | 26.7                                                | 26.8                                                    |
| 1000           | 0.079                                            | 21.7                | 0.49                                                 | 0.1 (+ve)                                                   | 7.72                                                | 7.74                                                    |

\*Error margin:  $\pm 5\%$ .

## 10. Coordinates of optimised geometry

**Table S8: Coordinates of optimised geometry of OAPo-T**

| Atomic label | Symbol | X        | Y        | Z        | Atomic label | Symbol | X        | Y        | Z        |
|--------------|--------|----------|----------|----------|--------------|--------|----------|----------|----------|
| 1            | N      | -1.99172 | -0.06314 | -0.12156 | 38           | H      | -2.97075 | -4.67837 | -1.83235 |
| 2            | H      | -1.07136 | -0.54461 | -0.27412 | 39           | C      | -0.00397 | -4.14165 | 0.236794 |
| 3            | N      | 0.127155 | 1.861496 | -0.06165 | 40           | H      | -0.2969  | -5.16586 | 0.413575 |
| 4            | N      | 2.008375 | 0.035691 | -0.20572 | 41           | C      | 6.569851 | -0.36827 | -1.11405 |
| 5            | N      | -0.10937 | -1.89343 | -0.21307 | 42           | H      | 6.438724 | -1.42585 | -1.36327 |
| 6            | C      | -1.13475 | 2.163475 | 0.3439   | 43           | H      | 7.635446 | -0.19312 | -0.92847 |
| 7            | C      | 2.229127 | -1.282   | 0.068425 | 44           | H      | 6.283241 | 0.206569 | -2.00034 |
| 8            | C      | -2.19743 | 1.224878 | 0.277683 | 45           | C      | 1.254554 | -3.63864 | 0.402339 |
| 9            | C      | 3.257132 | 2.146895 | -0.52223 | 46           | H      | 2.126142 | -4.18984 | 0.717799 |
| 10           | C      | -3.60473 | 1.368776 | 0.538836 | 47           | C      | -4.59879 | 3.647996 | -0.07943 |
| 11           | C      | 0.05854  | 4.052076 | 0.620944 | 48           | H      | -3.67489 | 4.001168 | -0.54583 |
| 12           | H      | 0.365154 | 5.052452 | 0.887639 | 49           | H      | -5.12406 | 4.514875 | 0.337336 |
| 13           | C      | 3.649808 | -1.45077 | 0.215269 | 50           | H      | -5.22325 | 3.221152 | -0.87039 |
| 14           | C      | 3.180867 | 0.739123 | -0.28201 | 51           | C      | -5.6577  | -0.16344 | 0.567147 |
| 15           | C      | -1.19414 | 3.537478 | 0.791457 | 52           | H      | -5.78956 | -1.23462 | 0.730949 |
| 16           | H      | -2.0483  | 4.056659 | 1.196196 | 53           | H      | -5.90855 | 0.304209 | 1.527451 |
| 17           | C      | 4.24535  | -0.2154  | -0.01929 | 54           | C      | 2.735415 | 4.57813  | -0.45298 |
| 18           | C      | 0.891533 | 2.986394 | 0.07991  | 55           | H      | 3.668469 | 4.777949 | 0.082999 |
| 19           | C      | -3.1625  | -0.77086 | -0.16148 | 56           | H      | 1.99572  | 5.294526 | -0.10779 |
| 20           | C      | -2.25633 | -3.14953 | -0.46529 | 57           | H      | 2.917614 | 4.810472 | -1.51005 |
| 21           | C      | -0.86284 | -3.03164 | -0.15167 | 58           | C      | -4.61846 | -2.59747 | -1.05088 |
| 22           | C      | 1.17126  | -2.22673 | 0.101172 | 59           | H      | -4.49529 | -3.21471 | -1.94536 |
| 23           | C      | -3.25671 | -2.15001 | -0.53283 | 60           | H      | -5.23226 | -1.75126 | -1.34421 |
| 24           | C      | 2.267315 | 3.134639 | -0.28919 | 61           | H      | -5.18537 | -3.20072 | -0.32993 |
| 25           | C      | -4.2074  | 0.142383 | 0.266701 | 62           | C      | -6.67622 | 0.329457 | -0.48019 |
| 26           | C      | -4.31591 | 2.605639 | 1.02275  | 63           | H      | -6.64756 | 1.418467 | -0.57678 |
| 27           | H      | -3.74426 | 3.073686 | 1.831319 | 64           | H      | -7.69342 | 0.044704 | -0.18886 |
| 28           | H      | -5.26945 | 2.310667 | 1.473481 | 65           | H      | -6.48056 | -0.08873 | -1.47301 |
| 29           | C      | 5.732866 | 0.017906 | 0.123422 | 66           | C      | 4.341093 | -2.99632 | 2.126122 |
| 30           | H      | 6.089373 | -0.57674 | 0.972656 | 67           | H      | 4.80606  | -2.17978 | 2.688609 |
| 31           | H      | 5.936116 | 1.055251 | 0.396919 | 68           | H      | 4.882965 | -3.91987 | 2.359408 |
| 32           | C      | 4.380043 | -2.70867 | 0.611113 | 69           | H      | 3.314504 | -3.10167 | 2.489406 |
| 33           | H      | 5.425293 | -2.63069 | 0.298329 | 70           | H      | 1.083044 | 0.528577 | -0.26701 |
| 34           | H      | 3.977429 | -3.56461 | 0.060203 | 71           | C      | 4.588318 | 2.649417 | -1.06687 |
| 35           | C      | -2.72785 | -4.56895 | -0.76763 | 72           | H      | 4.420436 | 3.377827 | -1.86457 |
| 36           | H      | -3.62765 | -4.83944 | -0.20645 | 73           | H      | 5.169534 | 1.844699 | -1.5058  |
| 37           | H      | -1.96597 | -5.31248 | -0.55193 | 74           | H      | 5.208967 | 3.148884 | -0.31149 |



**Table S9: Coordinates of optimised geometry of OAPo-C**

| Atomic label | Symbol | X        | Y        | Z        | Atomic label | Symbol | X        | Y        | Z        |
|--------------|--------|----------|----------|----------|--------------|--------|----------|----------|----------|
| 1            | N      | -0.76876 | -1.35042 | -0.10199 | 38           | C      | -4.03763 | -3.08982 | 0.270542 |
| 2            | N      | -2.18439 | 1.144564 | 0.18717  | 39           | H      | -4.50655 | -2.46476 | 1.034884 |
| 3            | N      | 1.503974 | 0.005239 | -0.15419 | 40           | H      | -4.02645 | -4.09847 | 0.695941 |
| 4            | N      | 0.022208 | 2.502115 | -0.07613 | 41           | C      | 1.181262 | -4.38969 | -1.21954 |
| 5            | C      | 2.467184 | -0.96596 | -0.03055 | 42           | H      | 1.175142 | -5.25167 | -0.54172 |
| 6            | C      | -2.81435 | -0.05985 | 0.228828 | 43           | H      | 2.125505 | -4.41546 | -1.76531 |
| 7            | C      | 1.386069 | 2.43143  | -0.14672 | 44           | H      | 0.396132 | -4.5386  | -1.96091 |
| 8            | C      | -0.35284 | -2.63804 | -0.33511 | 45           | C      | 3.392319 | -3.30423 | 0.010515 |
| 9            | C      | 2.110943 | 1.208011 | -0.08765 | 46           | H      | 4.034192 | -3.40002 | -0.87483 |
| 10           | C      | -2.11832 | -1.2865  | 0.086476 | 47           | H      | 3.055099 | -4.30602 | 0.275986 |
| 11           | C      | 0.996204 | -3.03401 | -0.53581 | 48           | H      | 4.011943 | -2.96644 | 0.836388 |
| 12           | C      | -1.54552 | -3.47341 | -0.24315 | 49           | C      | 5.565496 | -1.10246 | 1.801115 |
| 13           | C      | -0.41517 | 3.800168 | -0.16714 | 50           | H      | 5.511697 | -0.16968 | 2.371896 |
| 14           | C      | 3.548318 | 1.048595 | 0.082752 | 51           | H      | 6.587381 | -1.49094 | 1.878274 |
| 15           | C      | 3.784892 | -0.30622 | 0.137081 | 52           | H      | 4.894439 | -1.81558 | 2.29129  |
| 16           | C      | 2.210685 | -2.35758 | -0.19175 | 53           | C      | -4.18137 | 4.372221 | 0.535953 |
| 17           | C      | -3.13015 | 2.119596 | 0.32604  | 54           | H      | -3.94627 | 5.275049 | 1.103194 |
| 18           | C      | -2.6175  | -2.63796 | 0.03989  | 55           | H      | -4.91229 | 3.821239 | 1.123862 |
| 19           | C      | -1.75914 | 4.266007 | -0.03947 | 56           | H      | -4.67491 | 4.691635 | -0.39178 |
| 20           | C      | -2.92979 | 3.538583 | 0.2663   | 57           | C      | 5.143217 | 2.606491 | -1.16956 |
| 21           | C      | 1.85837  | 3.770612 | -0.29834 | 58           | H      | 5.622912 | 1.7807   | -1.70548 |
| 22           | H      | 2.885379 | 4.077203 | -0.40491 | 59           | H      | 5.887171 | 3.399948 | -1.03402 |
| 23           | C      | -4.23679 | 0.137572 | 0.397199 | 60           | H      | 4.346674 | 2.991238 | -1.81414 |
| 24           | H      | -5.00385 | -0.61825 | 0.444289 | 61           | C      | -1.91554 | 5.772629 | -0.2282  |
| 25           | C      | 5.181116 | -0.85944 | 0.326098 | 62           | H      | -2.83069 | 6.01347  | -0.77301 |
| 26           | H      | 5.890627 | -0.13671 | -0.08995 | 63           | H      | -1.09287 | 6.193443 | -0.80342 |
| 27           | H      | 5.337678 | -1.76932 | -0.25438 | 64           | H      | -1.9563  | 6.308289 | 0.72955  |
| 28           | C      | -4.43276 | 1.486969 | 0.469092 | 65           | C      | -1.22691 | -5.61187 | 1.108647 |
| 29           | H      | -5.38958 | 1.975428 | 0.574833 | 66           | H      | -0.18391 | -5.37753 | 1.34365  |
| 30           | C      | -1.66168 | -4.98001 | -0.22999 | 67           | H      | -1.33276 | -6.70208 | 1.075455 |
| 31           | H      | -1.10257 | -5.44051 | -1.04479 | 68           | H      | -1.84    | -5.23485 | 1.933954 |
| 32           | H      | -2.70639 | -5.24646 | -0.41512 | 69           | C      | -4.90336 | -3.10278 | -1.00552 |
| 33           | C      | 4.594239 | 2.129941 | 0.19123  | 70           | H      | -4.95926 | -2.10966 | -1.46136 |
| 34           | H      | 5.431204 | 1.7627   | 0.794074 | 71           | H      | -5.92318 | -3.43403 | -0.77933 |
| 35           | H      | 4.193114 | 2.981308 | 0.749129 | 72           | H      | -4.48305 | -3.7843  | -1.75267 |
| 36           | C      | 0.762101 | 4.604484 | -0.32447 | 73           | H      | -0.06409 | -0.57241 | -0.13648 |
| 37           | H      | 0.796399 | 5.678184 | -0.42239 | 74           | H      | -0.68055 | 1.7224   | 0.036402 |

## 11. References:

- S1 SAINT, version 6.45 /8/6/03 and version 8.34A, Bruker AXS, 2003, 2014.
- S2 G. M. Sheldrick, SADABS and SADABS 2014/5, *Program for Empirical Absorption Correction of Area Detector Data*, University of Göttingen, Germany, 1997, 2014.
- S3 (a) SHELXL -Version 2014/7; *Program for the Solution and Refinement of Crystal Structures*, University of Göttingen, Germany, 1993-2014; (b) G. M. Sheldrick, *Acta Cryst.* 2008, **A64**, 112.
- S4 (a) A. L. Spek, *PLATON, A Multipurpose Crystallographic Tool*, Utrecht University, Utrecht, The Netherlands, 2002. (b) A. L. Spek, *J. Appl. Cryst.*, 2003, **36**, 7.
- S5 N. N. Pati, B. S. Kumar, B. Chandra and P. K. Panda, *Eur. J. Org. Chem.*, 2017, 741.
- S6 M. J. Frisch, G. W. Trucks, H. B. Schlegel, G. E. Scuseria, M. A. Robb, J. R. Cheeseman, G. Scalmani, V. Barone, B. Mennucci, G. A. Petersson, H. Nakatsuji, M. Caricato, X. Li, H. P. Hratchian, A. F. Izmaylov, J. Bloino, G. Zheng, J. L. Sonnenberg, M. Hada, M. Ehara, K. Toyota, R. Fukuda, J. Hasegawa, M. Ishida, T. Nakajima, Y. Honda, O. Kitao, H. Nakai, T. Vreven, J. A. Montgomery, Jr., J. E. Peralta, F. Ogliaro, M. Bearpark, J. J. Heyd, E. Brothers, K. N. Kudin, V. N. Staroverov, R. Kobayashi, J. Normand, K. Raghavachari, A. Rendell, J. C. Burant, S. S. Iyengar, J. Tomasi, M. Cossi, N. Rega, J. M. Millam, M. Klene, J. E. Knox, J. B. Cross, V. Bakken, C. Adamo, J. Jaramillo, R. Gomperts, R. E. Stratmann, O. Yazyev, A. J. Austin, R. Cammi, C. Pomelli, J. W. Ochterski, R. L. Martin, K. Morokuma, V. G. Zakrzewski, G. A. Voth, P. Salvador, J. J. Dannenberg, S. Dapprich, A. D. Daniels, Ö. Farkas, J. B. Foresman, J. V. Ortiz, J. Cioslowski, and D. J. Fox, *Gaussian 09* (Gaussian, Inc., Wallingford CT, 2009).
- S7 (a) P. von R. Schleyer, C. Maerker, A. Dransfeld, H. Jiao and N. J. R. van Eikema Hommes, *J. Am. Chem. Soc.*, 1996, **118**, 6317-6318; (b) Z. Chen, C. S. Wannere, C. Corminboeuf, R. Puchta and P. von R. Schleyer, *Chem. Rev.*, 2005, **105**, 3842-3888.
- S8 (a) T. M. Krygowski and M. Cryanski, *Tetrahedron*, 1996, **52**, 1713-1722; (b) T. M. Krygowski and M. Cryanski, *Tetrahedron*, 1996, **52**, 10255-10264; (c) T. M. Krygowski and M. Cryanski, *Chem. Rev.*, 2001, **101**, 1385-1419.
